# Supplementary material for: Skin temperature and reproductive condition in wild female chimpanzees
Source: PeerJ. 2017 Dec 5;5:e4116. doi: 10.7717/peerj.4116 (PMC5721906; doi:10.7717/peerj.4116)
Supplement: Data S1 — Raw dataset [file peerj-05-4116-s001.csv]

Date	fem	img	temper	humid	dist	ambitemp	bodypart	preg	swell
2011-11-27	JT	IV_00438	31.1	58	10	29	Face	0	4
2011-11-27	JT	IV_00442	29.3	56	12	30	Swelling	0	4
2011-11-28	JT	IV_00465	29.6	56	5	29	Swelling	0	4
2011-11-28	JT	IV_00477	28.1	59	5	28	Foot	0	4
2011-11-29	JT	IV_00513	31.1	56	10	27	Face	0	4
2011-11-29	JT	IV_00513	29	56	10	27	Swelling	0	4
2011-11-29	OK	IV_00533	33.1	58	7	29	Face	0	4
2011-11-29	OK	IV_00533	31.6	58	7	29	Ear	0	4
2011-11-29	OK	IV_00533	28.2	58	7	29	Hand	0	4
2011-12-02	JN	IV_00542	29.1	72	9	20	Swelling	0	3
2011-12-03	JT	IV_00591	22.2	63	7	22	Hand	0	4
2011-12-03	JT	IV_00591	28.2	63	7	22	Swelling	0	4
2011-12-03	JT	IV_00593	25.5	62	7	24	Foot	0	4
2011-12-03	JT	IV_00594	22.5	62	7	24	Foot	0	4
2011-12-03	JT	IV_00606	31.7	57	7	26	Face	0	4
2011-12-03	OK	IV_00621	31.6	54	8	27	Swelling	0	4
2011-12-03	OK	IV_00622	33	54	8	27	Face	0	4
2011-12-03	OK	IV_00622	27.4	54	8	27	Foot	0	4
2011-12-03	OK	IV_00622	25.7	54	8	27	Hand	0	4
2011-12-03	OK	IV_00622	33	54	8	27	Eye	0	4
2011-12-03	OK	IV_00622	33.8	54	8	27	Nose	0	4
2011-12-03	JT	IV_00638	32.5	63	8	28	Face	0	4
2011-12-03	JT	IV_00639	28.8	62	8	28	Hand	0	4
2011-12-03	JT	IV_00641	33	63	8	28	Ear	0	4
2011-12-03	JT	IV_00647	30.2	61	7	29	Swelling	0	4
2011-12-03	JN	IV_00649	33.6	62	7	28	Ear	0	2
2011-12-03	JN	IV_00649	34.2	62	7	28	Neck	0	2
2011-12-03	JT	IV_00649	33.6	62	7	28	Ear	0	4
2011-12-06	JT	IV_00677	28.3	48	12	31	Swelling	0	2
2011-12-06	OK	IV_00683	32	55	6	31	Hand	1	4
2011-12-06	OK	IV_00684	34.4	55	6	31	Ear	1	4
2011-12-06	OK	IV_00684	34.5	55	6	31	Face	1	4
2011-12-06	OK	IV_00684	32	55	6	31	Foot	1	4
2011-12-06	OK	IV_00684	32	55	6	31	Foot	1	4
2011-12-06	OK	IV_00684	34.7	55	6	31	Eye	1	4
2011-12-06	OK	IV_00684	34.3	55	6	31	Mouth	1	4
2011-12-06	OK	IV_00684	35	55	6	31	Nose	1	4
2011-12-06	OK	IV_00686	32.6	53	6	31	Hand	1	4
2011-12-06	OK	IV_00690	33.3	50	3	31	Ear	1	4
2011-12-06	OK	IV_00697	31	58	15	29	Swelling	1	4
2011-12-08	AN	IV_00821	32	86	8	21	Swelling	0	2
2011-12-08	AN	IV_00822	34.4	87	8	21	Ear	0	2
2011-12-08	AN	IV_00823	32.9	87	8	22	Face	0	2
2011-12-08	AN	IV_00823	33.7	87	8	22	Eye	0	2
2011-12-08	AN	IV_00823	32.7	87	8	22	Mouth	0	2
2011-12-08	AN	IV_00823	33.5	87	8	22	Nose	0	2
2011-12-08	AN	IV_00824	27.3	87	8	22	Hand	0	2
2011-12-08	AN	IV_00824	33.5	87	8	22	Neck	0	2
2011-12-08	AN	IV_00826	33.1	86	8	22	Ear	0	2
2011-12-08	KN	IV_00830	31.4	84	7	22	Swelling	0	1
2011-12-08	HL	IV_00861	34.3	63	6	28	Ear	0	0
2011-12-08	HL	IV_00862	33.6	63	6	28	Face	0	0
2011-12-08	HL	IV_00862	32.3	63	6	28	Ear	0	0
2011-12-11	KM	IV_00869	32.6	57	12	28	Face	0	0
2011-12-11	KM	IV_00869	32.5	57	12	28	Ear	0	0
2011-12-15	NT	IV_00880	30	57	7	29	Foot	0	0
2011-12-15	NT	IV_00880	29	57	7	29	Hand	0	0
2011-12-15	NT	IV_00880	29.8	57	7	29	Foot	0	0
2011-12-15	NT	IV_00880	31.2	57	7	29	Hand	0	0
2011-12-15	NT	IV_00884	33.4	58	7	29	Face	0	0
2011-12-15	NT	IV_00884	33.2	58	7	29	Ear	0	0
2011-12-15	KR	IV_00898	34	66	3	28	Ear	0	0
2011-12-15	KR	IV_00900	34.5	65	3	28	Ear	0	0
2011-12-15	KR	IV_00902	33.9	65	3	27	Face	0	0
2011-12-15	KR	IV_00910	30.4	62	5	29	Hand	0	0
2011-12-15	KR	IV_00916	31.1	62	6	29	Foot	0	0
2011-12-15	KR	IV_00916	33.7	62	6	29	Face	0	0
2011-12-20	KR	IV_01115	34.3	56	6	28	Face	0	0
2011-12-20	KR	IV_01115	31.8	56	6	28	Hand	0	0
2011-12-20	KR	IV_01115	34.6	56	6	28	Ear	0	0
2011-12-20	KR	IV_01116	35.4	56	6	28	Ear	0	0
2011-12-20	KR	IV_01118	31.8	56	6	30	Hand	0	0
2011-12-21	KM	IV_01151	32.2	61	8	27	Swelling	0	2
2011-12-21	KM	IV_01164	31.4	45	7	29	Hand	0	2
2011-12-21	KM	IV_01177	33.4	44	7	29	Hand	0	2
2011-12-21	KL	IV_01189	34.2	43	7	30	Face	0	1
2011-12-21	KL	IV_01189	33.9	43	7	30	Eye	0	1
2011-12-21	KL	IV_01189	34.4	43	7	30	Mouth	0	1
2011-12-21	KL	IV_01206	32.7	56	7	27	Nose	0	1
2011-12-21	KL	IV_01207	33.7	56	7	26	Ear	0	1
2011-12-21	KM	IV_01238	31.8	62	7	32	Swelling	0	2
2011-12-21	KR	IV_01256	34.7	67	5	28	Ear	0	0
2011-12-21	KR	IV_01257	34.5	67	5	28	Face	0	0
2011-12-21	KR	IV_01262	34.4	67	5	28	Ear	0	0
2012-01-07	NT	IV_01313	33.8	51	6	29	Ear	0	0
2012-01-07	NT	IV_01314	31	51	6	29	Hand	0	0
2012-01-07	NB	IV_01513	30	60	5	32	Foot	0	4
2012-01-07	NB	IV_01513	31.8	60	5	32	Swelling	0	4
2012-01-07	NB	IV_01514	31.6	61	7	32	Foot	0	4
2012-01-08	OK	IV_01531	32.2	54	7	23	Mouth	1	4
2012-01-08	OK	IV_01531	29.3	54	7	23	Swelling	1	4
2012-01-08	OK	IV_01532	32.5	54	7	23	Eye	1	4
2012-01-08	OK	IV_01532	33.4	54	7	23	Nose	1	4
2012-01-08	OK	IV_01532	32.4	54	7	23	Face	1	4
2012-01-08	KR	IV_01643	30	57	4	29	Hand	0	0
2012-01-08	KR	IV_01648	34.3	57	4	29	Ear	0	0
2012-01-08	RS	IV_01653	34.2	57	10	30	Ear	0	0
2012-01-08	RS	IV_01654	31.1	57	10	30	Hand	0	0
2012-01-08	RS	IV_01655	31.3	57	10	30	Swelling	0	0
2012-01-12	KW	IV_02936	30.6	70	7	29	Hand	0	2
2012-01-12	KW	IV_02936	34.2	70	7	29	Ear	0	2
2012-01-12	KW	IV_02937	34.2	70	10	30	Ear	0	2
2012-01-12	KW	IV_02938	29.8	70	10	30	Hand	0	2
2012-01-12	KW	IV_02952	34.1	70	10	30	Mouth	0	2
2012-01-12	KW	IV_02955	34	70	10	30	Face	0	2
2012-01-12	KW	IV_02955	33.9	70	10	30	Eye	0	2
2012-01-12	KW	IV_02957	34.1	70	10	30	Nose	0	2
2012-01-13	JT	IV_02982	29.1	58	7	25	Swelling	0	4
2012-01-13	JT	IV_02984	30	62	6	26	Swelling	0	4
2012-01-13	JT	IV_2988	32.7	69	5	27	Face	0	4
2012-01-13	JT	IV_03110	34.3	68	5	29	Ear	0	4
2012-01-13	JT	IV_03110	33.7	68	5	29	Face	0	4
2012-01-13	JT	IV_03112	29.8	68	5	29	Hand	0	4
2012-01-13	JT	IV_03115	32.3	68	5	29	Swelling	0	4
2012-01-13	JT	IV_03156	34	77	6	30	Ear	0	4
2012-01-13	JT	IV_03156	27.5	77	6	30	Hand	0	4
2012-01-13	OK	IV_03158	34.4	64	10	30	Ear	1	4
2012-01-13	OK	IV_03158	34.1	64	10	30	Face	1	4
2012-01-13	OK	IV_03158	33.8	64	10	30	Eye	1	4
2012-01-13	OK	IV_03158	34.2	64	10	30	Mouth	1	4
2012-01-13	OK	IV_03159	32.1	64	10	30	Hand	1	4
2012-01-13	OK	IV_03159	32.2	64	10	30	Hand	1	4
2012-01-13	OK	IV_03159	31.4	64	10	30	Swelling	1	4
2012-02-02	KN	IV_03362	30.7	42	10	25	Eye	0	3
2012-02-02	KN	IV_03362	29	42	10	25	Swelling	0	3
2012-02-02	KN	IV_03364	31.7	56	10	23	Face	0	3
2012-02-02	KN	IV_03364	32.3	56	10	23	Eye	0	3
2012-02-02	KN	IV_03364	32.2	56	10	23	Mouth	0	3
2012-02-02	KN	IV_03364	32.6	56	10	23	Nose	0	3
2012-02-02	KN	IV_03368	26.8	49	7	24	Hand	0	3
2012-02-02	KN	IV_03372	23.6	49	7	24	Hand	0	3
2012-02-02	KW	IV_03377	32.4	51	8	24	Ear	0	3
2012-02-02	KW	IV_03377	30.4	51	8	24	Face	0	3
2012-02-02	OK	IV_03399	28.4	49	4	26	Swelling	1	4
2012-02-02	NT	IV_03424	31.5	60	3	24	Hand	0	0
2012-02-02	NT	IV_03429	33.2	60	3	24	Face	0	0
2012-02-02	NT	IV_03436	31.1	60	3	24	Hand	0	0
2012-02-02	NT	IV_03438	33.3	60	3	24	Ear	0	0
2012-02-02	KN	IV_03446	32.7	36	6	29	Face	0	3
2012-02-02	KN	IV_03446	29	36	6	29	Hand	0	3
2012-02-02	KN	IV_03446	33.2	36	6	29	Eye	0	3
2012-02-02	KN	IV_03446	32.6	36	6	29	Mouth	0	3
2012-02-02	KN	IV_03446	31.9	36	6	29	Nose	0	3
2012-02-02	KN	IV_03450	29.5	36	6	29	Swelling	0	3
2012-02-03	NT	IV_03452	30.7	73	6	30	Hand	0	0
2012-02-03	NT	IV_03452	32	73	6	30	Hand	0	0
2012-02-03	NT	IV_03453	34.4	73	6	30	Ear	0	0
2012-02-03	NT	IV_03453	33.8	73	6	30	Face	0	0
2012-02-03	NT	IV_03457	34.4	73	6	30	Ear	0	0
2012-02-03	NT	IV_03461	31.2	73	6	30	Foot	0	0
2012-02-03	OK	IV_03514	31.4	63	7	31	Hand	1	4
2012-02-03	OK	IV_03522	34.3	63	7	31	Face	1	4
2012-02-03	OK	IV_03522	34.4	63	7	31	Eye	1	4
2012-02-03	OK	IV_03522	33.6	63	7	31	Mouth	1	4
2012-02-03	OK	IV_03522	35.5	63	7	31	Nose	1	4
2012-02-03	OK	IV_03527	35.5	63	7	31	Ear	1	4
2012-02-03	OK	IV_03593	31.8	65	7	31	Swelling	1	4
2012-02-03	OK	IV_03595	31.9	65	7	31	Foot	1	4
2012-02-04	NB	IV_03616	32.1	42	5	29	Swelling	0	4
2012-02-04	NB	IV_03617	29.3	42	5	29	Hand	0	4
2012-02-04	NB	IV_03634	34.6	47	7	30	Ear	0	4
2012-02-04	NB	IV_03634	34	47	7	30	Face	0	4
2012-02-04	NB	IV_03634	34.2	47	7	30	Mouth	0	4
2012-02-04	NT	IV_03636	33.9	62	4	29	Face	0	0
2012-02-04	NT	IV_03636	34.8	62	4	29	Ear	0	0
2012-02-04	NT	IV_03636	33.9	62	4	29	Hand	0	0
2012-02-04	NT	IV_03637	31	62	4	29	Hand	0	0
2012-02-04	NB	IV_03643	30.6	62	7	32	Foot	0	4
2012-02-04	NB	IV_03662	34	61	6	32	Hand	0	4
2012-02-04	NB	IV_03695	32.2	55	6	32	Hand	0	4
2012-02-04	NB	IV_03695	33	55	6	32	Swelling	0	4
2012-02-04	NB	IV_03724	34.8	55	6	32	Eye	0	4
2012-02-04	NT	IV_03732	34.5	56	3	32	Face	0	0
2012-02-04	NT	IV_03732	35.4	56	3	32	Ear	0	0
2012-02-04	NT	IV_03733	34.1	56	3	32	Hand	0	0
2012-02-04	NB	IV_03752	35.3	43	8	31	Ear	0	4
2012-02-04	NB	IV_03753	30.9	43	8	31	Hand	0	4
2012-02-04	NB	IV_03753	32.5	43	8	31	Swelling	0	4
2012-02-04	NB	IV_03763	32.7	43	8	31	Foot	0	4
2012-02-04	NB	IV_03763	34	43	8	31	Hand	0	4
2012-02-04	NB	IV_03805	34.8	40	5	32	Face	0	4
2012-02-04	NB	IV_03805	34.9	40	5	32	Eye	0	4
2012-02-04	NB	IV_03805	34.7	40	5	32	Mouth	0	4
2012-02-04	NB	IV_03805	35.2	40	5	32	Nose	0	4
2012-02-04	NB	IV_03808	32.7	40	5	32	Hand	0	4
2012-02-04	NB	IV_03821	35.6	40	5	32	Neck	0	4
2012-02-04	NB	IV_03855	32.2	40	5	32	Hand	0	4
2012-02-04	NB	IV_03857	33.7	40	5	32	Swelling	0	4
2012-02-04	NB	IV_03862	35.5	42	6	32	Ear	0	4
2012-02-04	NB	IV_03877	33.5	44	8	32	Swelling	0	4
2012-02-04	NB	IV_03878	32.5	44	8	32	Hand	0	4
2012-02-04	NB	IV_03898	34.6	57	5	32	Ear	0	4
2012-02-04	NB	IV_03907	34	57	6	32	Face	0	4
2012-02-04	NB	IV_03907	35.6	57	6	32	Ear	0	4
2012-02-04	NB	IV_03907	34	57	6	32	Eye	0	4
2012-02-04	NB	IV_03907	34.4	57	6	32	Nose	0	4
2012-02-04	NB	IV_03916	34.2	59	7	32	Mouth	0	4
2012-02-04	NB	IV_03938	33.8	66	8	33	Swelling	0	4
2012-02-04	NT	IV_03948	34.4	68	6	32	Foot	0	0
2012-02-04	NB	IV_03952	32.8	68	6	32	Hand	0	4
2012-02-07	NT	IV_03989	33.4	46	6	32	Foot	0	0
2012-02-07	NT	IV_03991	35.6	46	6	32	Hand	0	0
2012-02-07	NT	IV_03996	35.4	31	7	31	Face	0	0
2012-02-07	NT	IV_03997	35.1	31	7	31	Ear	0	0
2012-02-07	NT	IV_03997	33.9	31	7	31	Hand	0	0
2012-02-07	NT	IV_04003	35.1	31	7	31	Ear	0	0
2012-02-07	NT	IV_04018	35.2	25	6	31	Face	0	0
2012-02-07	NT	IV_04018	34.5	25	6	31	Hand	0	0
2012-02-07	NT	IV_04021	33.2	27	6	31	Hand	0	0
2012-02-07	NT	IV_04022	36.1	27	6	31	Ear	0	0
2012-02-07	NT	IV_04023	35.8	27	6	31	Ear	0	0
2012-02-07	NT	IV_04045	32.3	26	8	33	Swelling	0	0
2012-02-07	NT	IV_04083	33.1	26	8	33	Foot	0	0
2012-02-07	NT	IV_04092	35.5	28	6	32	Hand	0	0
2012-02-07	NT	IV_04102	36.4	28	6	32	Ear	0	0
2012-02-07	NT	IV_04104	36.3	27	3	32	Face	0	0
2012-02-07	NB	IV_04109	33.4	27	3	32	Hand	0	0
2012-02-07	NT	IV_04111	32.4	30	5	30	Foot	0	0
2012-02-07	NT	IV_04111	34.7	30	5	30	Hand	0	0
2012-02-07	NT	IV_04112	36.7	30	5	30	Ear	0	0
2012-02-07	NT	IV_04148	36.4	30	5	30	Ear	0	0
2012-02-13	JN	IV_05260	34.1	54	6	29	Hand	0	4
2012-02-25	NT	IV_05712	35.9	41	3	31	Face	0	0
2012-02-25	NT	IV_05712	36.5	41	3	31	Ear	0	0
2012-02-25	NT	IV_05712	34.3	41	3	31	Hand	0	0
2012-02-25	NT	IV_05716	35.6	41	3	31	Hand	0	0
2012-02-25	NT	IV_05716	36.7	41	3	31	Ear	0	0
2012-02-26	KW	IV_05725	31.8	63	10	26	Face	0	1
2012-02-26	KW	IV_05725	28	63	10	26	Foot	0	1
2012-02-26	KW	IV_05727	31.5	63	10	27	Ear	0	1
2012-02-26	KW	IV_05727	25.8	63	10	27	Hand	0	1
2012-02-26	OK	IV_05740	30.2	65	15	26	Swelling	1	4
2012-02-26	OK	IV_05740	32.8	65	15	26	Face	1	4
2012-02-27	JN	IV_05889	34.1	66	6	25	Ear	0	3
2012-02-27	JN	IV_05889	34.2	66	6	25	Neck	0	3
2012-02-27	JN	IV_05890	32.9	67	6	25	Face	0	3
2012-02-27	JN	IV_05890	30.2	67	6	25	Hand	0	3
2012-02-27	JN	IV_05890	33.2	67	6	25	Eye	0	3
2012-02-27	JN	IV_05890	32.9	67	6	25	Mouth	0	3
2012-02-27	JN	IV_05890	32.4	67	6	25	Nose	0	3
2012-02-27	JN	IV_05891	29.1	68	10	25	Hand	0	3
2012-02-27	JN	IV_05891	29.1	68	10	25	Swelling	0	3
2012-02-27	JN	IV_05893	28.1	68	10	25	Foot	0	3
2012-02-27	JN	IV_05894	29.6	73	9	26	Hand	0	3
2012-02-27	JN	IV_05895	29.2	73	8	26	Swelling	0	3
2012-02-27	JN	IV_05896	31.7	69	6	26	Face	0	3
2012-02-27	JN	IV_05896	29.3	69	6	26	Hand	0	3
2012-02-27	JN	IV_05896	32.5	69	6	26	Eye	0	3
2012-02-27	JN	IV_05896	31.3	69	6	26	Mouth	0	3
2012-02-27	JN	IV_05896	32.6	69	6	26	Nose	0	3
2012-02-27	JN	IV_05910	33.5	69	6	26	Ear	0	3
2012-02-27	JN	IV_05914	33.6	69	6	26	Foot	0	3
2012-02-27	JN	IV_05918	33.4	69	6	26	Hand	0	3
2012-02-27	JN	IV_05922	32.5	76	10	25	Ear	0	3
2012-02-27	JN	IV_05922	31.9	76	10	25	Face	0	3
2012-02-27	JN	IV_05922	32.4	76	10	25	Eye	0	3
2012-02-27	JN	IV_05922	32.3	76	10	25	Mouth	0	3
2012-02-27	JN	IV_05922	32.3	76	10	25	Nose	0	3
2012-02-27	JN	IV_05923	30.3	77	10	25	Swelling	0	3
2012-02-27	JN	IV_05928	32	63	5	26	Hand	0	3
2012-02-27	JN	IV_05951	34.1	63	4	26	Ear	0	3
2012-02-27	JN	IV_05996	32.6	64	5	25	Hand	0	3
2012-02-27	JN	IV_06003	34.8	64	5	25	Ear	0	3
2012-02-27	JN	IV_06015	33.1	64	5	25	Foot	0	3
2012-02-27	JN	IV_06019	33.6	64	5	25	Face	0	3
2012-02-27	JN	IV_06019	33.7	64	5	25	Eye	0	3
2012-02-27	JN	IV_06019	34	64	5	25	Mouth	0	3
2012-02-27	JN	IV_06019	34.1	64	5	25	Nose	0	3
2012-02-27	NT	IV_06040	35.7	65	8	26	Hand	0	0
2012-03-01	KW	IV_06655	33.2	62	10	25	Swelling	0	0
2012-03-01	KW	IV_06655	30.3	62	10	25	Hand	0	0
2012-03-01	KW	IV_06655	29.7	62	10	25	Foot	0	0
2012-03-01	KW	IV_06655	30.9	62	10	25	Hand	0	0
2012-03-01	KW	IV_06656	35	62	10	25	Ear	0	0
2012-03-01	KW	IV_06657	33.4	63	10	25	Face	0	0
2012-03-01	KW	IV_06746	34.7	66	10	25	Ear	0	0
2012-03-01	KW	IV_06746	32.9	66	10	25	Foot	0	0
2012-03-01	KW	IV_06785	34.9	42	8	30	Face	0	0
2012-03-01	KW	IV_06785	33.1	42	8	30	Hand	0	0
2012-03-05	RS	IV_06824	31.4	56	6	23	Face	0	1
2012-03-05	RS	IV_06824	27.1	56	6	23	Hand	0	1
2012-03-05	RS	IV_06824	31.3	56	6	23	Eye	0	1
2012-03-05	RS	IV_06824	31.8	56	6	23	Mouth	0	1
2012-03-05	RS	IV_06824	31.4	56	6	23	Nose	0	1
2012-03-05	RS	IV_06825	25	56	7	23	Foot	0	1
2012-03-05	RS	IV_06825	24.9	56	7	23	Swelling	0	1
2012-03-05	RS	IV_06826	31.3	56	5	23	Ear	0	1
2012-03-05	RS	IV_06826	25.7	56	5	23	Hand	0	1
2012-03-05	RS	IV_06829	25.7	74	7	20	Hand	0	1
2012-03-05	RS	IV_06829	25.3	74	7	20	Swelling	0	1
2012-03-05	RS	IV_06832	33.9	46	7	27	Ear	0	1
2012-03-05	RS	IV_06837	34	46	7	27	Face	0	1
2012-03-05	RS	IV_06850	33.7	46	7	27	Eye	0	1
2012-03-05	RS	IV_06850	34.2	46	7	27	Mouth	0	1
2012-03-05	RS	IV_06858	33.2	42	10	29	Swelling	0	1
2012-03-05	RS	IV_06860	35.1	43	5	27	Ear	0	1
2012-03-05	RS	IV_06862	31.3	45	5	27	Hand	0	1
2012-03-05	RS	IV_06871	31.5	50	10	26	Hand	0	1
2012-03-05	RS	IV_06883	34.9	55	7	27	Ear	0	1
2012-03-05	RS	IV_06883	33.9	55	7	27	Face	0	1
2012-03-05	RS	IV_06883	33.9	55	7	27	Eye	0	1
2012-03-05	RS	IV_06883	34.1	55	7	27	Mouth	0	1
2012-03-05	RS	IV_06883	34.5	55	7	27	Nose	0	1
2012-03-05	RS	IV_06888	32.2	55	7	27	Swelling	0	1
2012-03-05	RS	IV_06959	33.8	55	7	27	Foot	0	1
2012-03-09	KL	IV_07298	34.3	53	10	28	Ear	1	0
2012-03-09	KL	IV_07299	33.1	53	10	28	Hand	1	0
2012-03-09	KL	IV_07300	30.5	53	10	28	Hand	1	0
2012-03-09	KL	IV_07334	34	53	10	28	Face	1	0
2012-03-09	KL	IV_07334	34.5	53	10	28	Eye	1	0
2012-03-09	KL	IV_07334	33.6	53	10	28	Mouth	1	0
2012-03-09	KL	IV_07334	34.6	53	10	28	Nose	1	0
2012-03-09	KL	IV_07347	35.1	53	10	28	Ear	1	0
2012-03-16	KL	IV_07999	34	80	5	23	Ear	1	0
2012-03-16	KL	IV_08000	32.5	80	5	23	Face	1	0
2012-03-16	KL	IV_08000	32.3	80	5	23	Eye	1	0
2012-03-16	KL	IV_08000	33.2	80	5	23	Mouth	1	0
2012-03-16	KL	IV_08000	31.8	80	5	23	Nose	1	0
2012-03-16	NB	IV_08012	33.4	79	5	23	Ear	0	0
2012-03-16	NB	IV_08012	33.1	79	5	23	Mouth	0	0
2012-03-16	NB	IV_08012	30.8	79	5	23	Nose	0	0
2012-03-16	NB	IV_08013	29.8	79	5	23	Hand	0	0
2012-03-16	NB	IV_08017	33.6	79	5	23	Eye	0	0
2012-03-16	KL	IV_08080	28.6	76	6	24	Hand	1	0
2012-03-16	KL	IV_08095	33.9	77	9	25	Ear	1	0
2012-03-16	KL	IV_08095	33.9	77	9	25	Face	1	0
2012-03-16	KL	IV_08112	35.4	77	9	25	Mouth	1	0
2012-03-16	KL	IV_08387	34.5	63	5	26	Face	1	0
2012-03-16	KL	IV_08387	34.7	63	5	26	Eye	1	0
2012-03-16	KL	IV_08387	34	63	5	26	Mouth	1	0
2012-03-16	KL	IV_08387	34.8	63	5	26	Nose	1	0
2012-03-16	KL	IV_08390	35.1	63	3	26	Ear	1	0
2012-03-16	KL	IV_08415	35.7	56	7	27	Ear	1	0
2012-03-16	KL	IV_08427	35.1	57	7	28	Face	1	0
2012-03-16	KL	IV_08427	35.1	57	7	28	Eye	1	0
2012-03-16	KL	IV_08427	35	57	7	28	Mouth	1	0
2012-03-16	KL	IV_08427	35.5	57	7	28	Nose	1	0
2012-03-16	KL	IV_08431	33.8	57	7	28	Hand	1	0
2012-03-16	KL	IV_08456	33.7	53	10	29	Foot	1	0
2012-03-20	JT	IV_08489	35.4	82	5	23	Ear	0	3
2012-03-20	JT	IV_08490	31	82	5	23	Swelling	0	3
2012-03-20	JT	IV_08495	30.4	82	5	23	Foot	0	3
2012-03-20	JT	IV_08496	33.6	82	5	23	Face	0	3
2012-03-20	JT	IV_08510	31.7	69	6	26	Swelling	0	3
2012-03-20	JT	IV_08525	35.5	64	5	27	Ear	0	3
2012-03-20	JT	IV_08531	34.3	64	5	27	Face	0	3
2012-03-20	JT	IV_08544	33.5	64	5	27	Hand	0	3
2012-03-20	JT	IV_08557	31.1	65	8	26	Swelling	0	3
2012-03-20	JT	IV_08563	34.4	65	8	26	Ear	0	3
2012-03-20	JT	IV_08564	29.8	65	8	26	Hand	0	3
2012-03-20	JT	IV_08564	30.8	65	8	26	Hand	0	3
2012-03-20	JT	IV_08573	33.6	65	8	26	Face	0	3
2012-03-23	OK	IV_08626	33.4	81	5	23	Ear	1	3
2012-03-23	OK	IV_08626	31.9	81	5	23	Nose	1	3
2012-03-23	OK	IV_08630	33.2	80	4	24	Face	1	3
2012-03-23	OK	IV_08630	34.2	80	4	24	Neck	1	3
2012-03-23	OK	IV_08630	33.6	80	4	24	Eye	1	3
2012-03-23	OK	IV_08630	33.1	80	4	24	Mouth	1	3
2012-03-23	OK	IV_08633	30.1	80	4	24	Hand	1	3
2012-03-23	OK	IV_08645	34.3	77	8	24	Ear	1	3
2012-03-23	OK	IV_08646	33.7	77	6	24	Mouth	1	3
2012-03-23	OK	IV_08646	33.5	77	6	24	Face	1	3
2012-03-23	OK	IV_08648	31.9	76	3	25	Swelling	1	3
2012-03-23	OK	IV_08649	34.3	75	9	24	Ear	1	3
2012-03-23	OK	IV_08649	33.5	75	9	24	Face	1	3
2012-03-23	OK	IV_08649	29.9	75	9	24	Hand	1	3
2012-03-23	OK	IV_08649	33.4	75	9	24	Eye	1	3
2012-03-23	OK	IV_08649	33.3	75	9	24	Mouth	1	3
2012-03-23	OK	IV_08649	34.5	75	9	24	Nose	1	3
2012-03-23	OK	IV_08651	32.1	66	6	26	Swelling	1	3
2012-03-23	OK	IV_08655	32	66	6	26	Foot	1	3
2012-03-23	OK	IV_08662	35	65	5	27	Ear	1	3
2012-03-23	OK	IV_08682	33.7	65	5	27	Face	1	3
2012-03-23	OK	IV_08682	33.9	65	5	27	Eye	1	3
2012-03-23	OK	IV_08682	33.4	65	5	27	Mouth	1	3
2012-03-23	OK	IV_08682	34.8	65	5	27	Nose	1	3
2012-03-24	KW	IV_08686	26.3	83	8	22	Hand	0	0
2012-03-24	KW	IV_08688	31.7	83	6	23	Hand	0	0
2012-03-24	KW	IV_08689	34.1	83	6	23	Ear	0	0
2012-03-24	KW	IV_08690	33.2	83	6	23	Foot	0	0
2012-03-24	KW	IV_08697	35.4	83	6	23	Mouth	0	0
2012-03-24	KR	IV_08700	35.2	83	6	23	Ear	0	0
2012-03-24	KR	IV_08700	34	83	6	23	Face	0	0
2012-03-24	KW	IV_08704	33.7	83	6	23	Eye	0	0
2012-03-24	KW	IV_08704	34.4	83	6	23	Nose	0	0
2012-03-24	KW	IV_08711	33.2	83	6	23	Face	0	0
2012-03-24	KW	IV_08719	33.3	63	7	27	Face	0	0
2012-03-24	KW	IV_08720	34.3	63	7	27	Eye	0	0
2012-03-24	KW	IV_08724	34.7	61	4	27	Ear	0	0
2012-03-24	KW	IV_08725	33.9	62	4	29	Foot	0	0
2012-03-24	KW	IV_08725	30.5	62	4	29	Hand	0	0
2012-03-24	KW	IV_08726	32.3	50	7	29	Swelling	0	0
2012-03-24	KW	IV_08734	34.3	44	7	28	Ear	0	0
2012-03-24	KW	IV_08743	34.7	44	7	28	Ear	0	0
2012-03-24	KW	IV_08743	34.3	44	7	28	Mouth	0	0
2012-03-24	KW	IV_08748	34.3	44	7	28	Eye	0	0
2012-03-24	KW	IV_08748	34.6	44	7	28	Nose	0	0
2012-03-24	KW	IV_08748	34	44	7	28	Face	0	0
2012-03-24	KR	IV_08798	35.1	44	7	28	Ear	0	0
2012-03-24	KR	IV_08799	34.4	44	7	28	Face	0	0
2012-03-24	KR	IV_08799	32.3	44	7	28	Hand	0	0
2012-03-24	KW	IV_08801	33	44	7	28	Foot	0	0
2012-03-24	KW	IV_08816	32.5	44	7	28	Hand	0	0
2012-03-24	KR	IV_08826	32.2	44	7	28	Hand	0	0
2012-03-24	KW	IV_08837	34.9	44	7	28	Neck	0	0
2012-03-24	KR	IV_08871	35	44	7	28	Ear	0	0
2012-03-24	KW	IV_08897	34.4	57	5	28	Mouth	0	0
2012-03-24	KW	IV_08897	35.1	57	5	28	Nose	0	0
2012-03-24	KW	IV_08898	34.5	57	5	28	Eye	0	0
2012-03-24	KW	IV_08901	35.5	57	5	28	Ear	0	0
2012-03-24	KW	IV_08901	33.7	57	5	28	Face	0	0
2012-03-29	KU	IV_08985	36.2	65	5	28	Ear	0	3
2012-03-29	KU	IV_08985	34.6	65	5	28	Hand	0	3
2012-03-29	KU	IV_08985	35.3	65	5	28	Mouth	0	3
2012-03-29	KU	IV_08985	34.8	65	5	28	Face	0	3
2012-04-15	OK	IV_09920	32.7	77	6	26	Swelling	1	3
2012-04-15	OK	IV_09925	34.8	77	6	26	Neck	1	3
2012-04-19	KL	IV_10027	26	85	5	19	Swelling	1	0
2012-04-19	KL	IV_10041	22.7	85	12	19	Foot	1	0
2012-04-24	KL	IV_10058	33.2	91	3	25	Ear	1	1
2012-04-24	KL	IV_10058	32.7	91	3	25	Mouth	1	1
2012-04-24	KL	IV_10066	32.6	91	3	25	Eye	1	1
2012-04-24	KL	IV_10066	28.1	91	3	25	Nose	1	1
2012-04-24	KL	IV_10066	32.2	91	3	25	Face	1	1
2012-04-24	KL	IV_10070	27	91	3	25	Swelling	1	1
2012-04-24	KL	IV_10135	23	94	10	22	Foot	1	1
2012-04-24	KL	IV_10135	27.3	94	10	22	Swelling	1	1
2012-04-24	KL	IV_10136	23.3	94	8	22	Foot	1	1
2012-04-24	KL	IV_10141	31.5	94	7	22	Ear	1	1
2012-04-28	NT	IV_10602	28.3	82	6	20	Swelling	0	0
2012-04-28	NT	IV_10602	19.7	82	6	20	Foot	0	0
2012-04-28	NT	IV_10603	20.2	82	6	20	Foot	0	0
2012-04-28	NT	IV_10605	20.2	82	12	20	Hand	0	0
2012-04-28	NT	IV_10607	28.2	82	10	20	Face	0	0
2012-04-28	NT	IV_10607	22.4	82	10	20	Hand	0	0
2012-04-28	NT	IV_10624	29.7	90	5	21	Ear	0	0
2012-04-28	NT	IV_10625	26.9	90	5	21	Hand	0	0
2012-04-28	NT	IV_10625	29.5	90	5	21	Face	0	0
2012-04-28	NT	IV_10628	30.1	90	10	21	Swelling	0	0
2012-04-28	NT	IV_10643	31.4	90	10	21	Ear	0	0
2012-04-28	NT	IV_10647	25.4	90	10	21	Hand	0	0
2012-04-28	NT	IV_10670	22	90	10	21	Foot	0	0
2012-04-28	NT	IV_10673	22.1	84	10	23	Foot	0	0
2012-04-28	OK	IV_10684	31	86	6	22	Ear	1	3
2012-04-28	OK	IV_10684	32.4	86	6	22	Face	1	3
2012-04-28	NT	IV_10707	32.5	90	3	21	Face	0	0
2012-04-28	NT	IV_10711	33.1	90	3	21	Ear	0	0
2012-04-28	NT	IV_10714	30.6	90	3	21	Hand	0	0
2012-04-28	NT	IV_10786	32.7	90	3	21	Ear	0	0
2012-04-28	NT	IV_10839	32.8	90	3	21	Face	0	0
2012-04-28	NT	IV_10856	30.9	76	6	24	Swelling	0	0
2012-04-28	NT	IV_10856	24.4	76	6	24	Foot	0	0
2012-04-28	NB	IV_10860	28.8	79	4	24	Hand	0	0
2012-04-28	NB	IV_10860	29.7	79	4	24	Hand	0	0
2012-04-28	NT	IV_10867	32.9	79	4	24	Ear	0	0
2012-04-28	NB	IV_10869	32.6	79	4	24	Mouth	0	0
2012-04-28	NB	IV_10871	32.2	79	4	24	Eye	0	0
2012-04-28	NB	IV_10871	32.2	79	4	24	Face	0	0
2012-04-28	NB	IV_10872	33.6	79	4	24	Ear	0	0
2012-04-28	NT	IV_10880	27.5	79	8	24	Hand	0	0
2012-04-28	NT	IV_10901	24.5	79	10	24	Foot	0	0
2012-04-28	NT	IV_10933	33.4	82	5	24	Face	0	0
2012-04-28	NT	IV_10940	31.5	82	5	24	Foot	0	0
2012-04-28	NT	IV_10962	32.1	80	5	25	Hand	0	0
2012-04-28	NB	IV_10964	34.1	80	5	25	Nose	0	0
2012-04-28	NT	IV_10965	33.7	80	5	25	Ear	0	0
2012-04-28	NT	IV_10984	32.6	79	5	24	Hand	0	0
2012-04-28	NT	IV_11010	34	79	5	24	Ear	0	0
2012-04-28	NT	IV_11019	33.6	79	5	24	Face	0	0
2012-04-28	NB	IV_11076	34.3	79	5	24	Foot	0	0
2012-04-28	NT	IV_11128	32.7	79	5	24	Hand	0	0
2012-04-28	NT	IV_11133	33.1	76	10	25	Face	0	0
2012-04-28	NT	IV_11133	30.5	76	10	25	Foot	0	0
2012-04-28	NT	IV_11133	30.1	76	10	25	Foot	0	0
2012-04-28	NT	IV_11135	31	76	10	25	Hand	0	0
2012-04-28	NT	IV_11147	32	76	10	25	Hand	0	0
2012-04-28	NT	IV_11167	32	76	8	25	Swelling	0	0
2012-04-28	NT	IV_11177	34.9	77	6	26	Ear	0	0
2012-04-28	NT	IV_11188	34.5	72	4	25	Ear	0	0
2012-04-28	NT	IV_11194	34	64	8	26	Ear	0	0
2012-04-28	NT	IV_11194	31.9	64	8	26	Hand	0	0
2012-04-28	NT	IV_11204	33.6	64	8	26	Face	0	0
2012-04-28	NT	IV_11304	32.6	64	8	26	Hand	0	0
2012-04-28	NT	IV_11344	33.9	64	8	26	Ear	0	0
2012-04-28	NT	IV_11419	34.1	64	8	26	Face	0	0
2012-04-28	NT	IV_11419	32.3	64	8	26	Foot	0	0
2012-04-28	NT	IV_11420	33	64	8	26	Hand	0	0
2012-05-02	JN	IV_11428	30.3	88	10	24	Swelling	1	0
2012-05-03	KN	IV_11429	30.3	88	10	22	Face	0	1
2012-05-03	KN	IV_11432	32.4	79	10	24	Eye	0	1
2012-05-03	KN	IV_11444	33	79	8	24	Ear	0	1
2012-05-03	KN	IV_11450	29.1	79	10	24	Swelling	0	1
2013-10-30	KL	IV_11535	30.6	80	5	26.5	Swelling	0	4
2013-10-30	KL	IV_11539	35.3	79.6	4	25.1	Face	0	4
2013-10-30	KL	IV_11540	33	70.1	7	25.1	Swelling	0	4
2013-10-30	KL	IV_11541	34.1	70.1	8	25.1	Eye	0	4
2013-10-30	KL	IV_11542	33.7	70.1	8	25.1	Ear	0	4
2013-10-30	KL	IV_11543	34.5	70.1	8	25.1	Eye	0	4
2013-10-30	OK	IV_11529	27.3	93.5	0	19.8	Ear	0	0
2013-10-30	OK	IV_11530	24.7	93.5	0	19.8	Swelling	0	0
2013-10-31	KA	IV_11560	33.1	93	5	22.4	Ear	0	4
2013-10-31	KA	IV_11561	31.3	93	5	22.4	Ear	0	4
2013-10-31	KA	IV_11562	32.8	93	5	22.4	Eye	0	4
2013-10-31	KL	IV_11545	28.5	82.5	6	21.2	Swelling	0	4
2013-10-31	KL	IV_11546	31.5	82.5	6	21.2	Ear	0	4
2013-10-31	KL	IV_11547	32.4	82.5	6	21.2	Face	0	4
2013-10-31	KL	IV_11563	29.2	93.8	5	23.3	Swelling	0	4
2013-10-31	KL	IV_11566	31	93.8	5	23.3	Ear	0	4
2013-10-31	KL	IV_11568	31.7	93.8	5	23.3	Face	0	4
2013-10-31	KL	IV_11571	31.2	91.8	7	23.4	Swelling	0	4
2013-10-31	KL	IV_11573	30.3	91.5	6	23.6	Swelling	0	4
2013-11-02	JN	IV_11596	34.5	75	6	27	Ear	1	0
2013-11-02	KA	IV_11598	32.4	65	7	27	Swelling	0	4
2013-11-02	KA	IV_11599	29.8	65	7	27	Ear	0	4
2013-11-02	KL	IV_11580	30.2	96.5	10	20.1	Swelling	0	4
2013-11-02	OK	IV_11582	31	85	5	24	Foot	0	0
2013-11-02	OK	IV_11583	34.5	85	5	24	Ear	0	0
2013-11-02	OK	IV_11584	34	85	5	24	Nose	0	0
2013-11-02	OK	IV_11586	29.5	85	5	24	Swelling	0	0
2013-11-02	RH	IV_11588	33.8	85	10	24	Face	0	4
2013-11-02	RH	IV_11591	29.5	80	10	26	Hand	0	4
2013-11-02	RH	IV_11592	31.8	80	10	26	Swelling	0	4
2013-11-05	JN	IV_11603	32.5	91.8	6	23.6	Face	1	0
2013-11-05	JN	IV_11607	28.5	91.8	6	23.6	Hand	1	0
2013-11-05	JN	IV_11608	31	91.8	6	23.6	Ear	1	0
2013-11-05	JN	IV_11611	32.3	77	5	24.7	Ear	1	0
2013-11-05	JN	IV_11612	33.5	77	5	24.7	Face	1	0
2013-11-05	OK	IV_11617	34.8	82.6	2	24.8	Ear	0	0
2013-11-05	OK	IV_11618	30.7	82.6	2	24.8	Hand	0	0
2013-11-05	OK	IV_11619	35.6	82.6	2	24.8	Nose	0	0
2013-11-05	OK	IV_11620	31.6	82.6	2	24.8	Foot	0	0
2013-11-07	IN	IV_11638	25.2	80	6	23.5	Foot	0	4
2013-11-07	IN	IV_11639	29.9	80	7	23.5	Swelling	0	4
2013-11-07	JN	IV_11623	26.9	80	7	23	Swelling	1	0
2013-11-07	JN	IV_11624	32.1	80	7	23	Mouth	1	0
2013-11-07	JN	IV_11649	34.5	78	7	23.7	Mouth	1	0
2013-11-07	JN	IV_11650	30	78	7	25.1	Hand	1	0
2013-11-07	JN	IV_11652	33	78	7	25.1	Nose	1	0
2013-11-07	JN	IV_11653	31.4	78	7	25.1	Hand	1	0
2013-11-07	NB	IV_11625	30.3	80	3	23	Swelling	0	0
2013-11-07	NB	IV_11627	33.2	80	3	23	Face	0	0
2013-11-07	NB	IV_11628	33.7	80	3	23	Ear	0	0
2013-11-07	NB	IV_11629	29.3	80	3	23	Hand	0	0
2013-11-07	NB	IV_11632	34.9	80	3	23	Ear	0	0
2013-11-07	NB	IV_11633	29.3	80	3	23	Foot	0	0
2013-11-07	OK	IV_11636	34.4	80	5	23.5	Ear	0	0
2013-11-07	OK	IV_11637	33.8	80	5	23.5	Face	0	0
2013-11-07	OK	IV_11645	32.4	78	7	24.1	Ear	0	0
2013-11-07	OK	IV_11646	31	78	7	24.1	Foot	0	0
2013-11-07	OK	IV_11647	30.7	78	8	24.1	Swelling	0	0
2013-11-10	NB	IV_11657	30.4	93	5	20.5	Face	0	0
2013-11-10	NB	IV_11658	30.1	93	5	20.5	Ear	0	0
2013-11-12	OK	IV_11673	34.7	40	4	26	Face	0	0
2013-11-12	OK	IV_11674	34.6	40	4	26	Ear	0	0
2013-11-12	OK	IV_11675	31.1	40	4	26	Swelling	0	0
2013-11-14	KL	IV_11685	30.6	93.5	5	21.8	Ear	0	0
2013-11-14	KL	IV_11686	32.5	93.5	5	21.8	Eye	0	0
2013-11-14	KL	IV_11688	30.5	93.5	5	21.8	Mouth	0	0
2013-11-14	KL	IV_11689	24.9	93.5	5	21.8	Swelling	0	0
2013-11-14	KU	IV_11693	30.8	93	3	22.4	Hand	1	4
2013-11-14	KU	IV_11694	30.5	93	4	22.4	Swelling	1	4
2013-11-14	NB	IV_11695	26.5	93	3	22.4	Hand	0	0
2013-11-14	NB	IV_11696	30.1	93	3	22.4	Ear	0	0
2013-11-14	NB	IV_11697	31.4	93	3	22.4	Face	0	0
2013-11-14	OK	IV_11690	30.8	93	5	22.4	Swelling	0	0
2013-11-14	OK	IV_11692	32.6	93	5	22.4	Face	0	0
2013-11-29	JN	IV_11714	30.4	90	6	19.9	Ear	1	1
2013-11-29	JN	IV_11715	30.2	90	6	19.9	Face	1	1
2013-11-29	JN	IV_11718	22.5	90	10	19.9	Hand	1	1
2013-11-29	JN	IV_11719	25.1	89.9	5	20	Swelling	1	1
2013-11-29	JN	IV_11723	31.6	88	6	21.8	Face	1	1
2013-11-29	JN	IV_11726	29.2	88	6	21.8	Hand	1	1
2013-11-29	KU	IV_11704	28.5	91	8	19	Swelling	1	1
2013-11-30	JN	IV_11730	26.5	85	8	22.6	Swelling	1	1
2013-11-30	JN	IV_11731	30	88	5	21.6	Swelling	1	1
2013-11-30	JN	IV_11732	32.6	88	5	21.6	Ear	1	1
2013-11-30	JN	IV_11733	32.2	88	5	21.6	Ear	1	1
2013-11-30	JN	IV_11734	32.3	88	5	21.6	Face	1	1
2013-11-30	JN	IV_11739	33.3	90.6	5	21.7	Ear	1	1
2013-11-30	JN	IV_11740	33.7	90.6	5	21.7	Mouth	1	1
2013-11-30	JN	IV_11746	32.2	90.6	6	21.7	Hand	1	1
2013-11-30	JN	IV_11746	32.1	90.6	6	21.7	Hand	1	1
2013-11-30	JN	IV_11749	33.2	90.6	6	21.7	Face	1	1
2013-11-30	JN	IV_11752	33.5	90.6	6	21.7	Eye	1	1
2013-11-30	KU	IV_11728	27.8	92.2	10	19.3	Swelling	1	1
2013-11-30	OK	IV_11738	32	88	2	21.6	Swelling	0	4
2013-12-02	JN	IV_11754	28.6	95.1	5	20.8	Ear	1	1
2013-12-02	JN	IV_11755	29.6	95.1	5	20.8	Hand	1	1
2013-12-02	JN	IV_11756	31.9	95.1	5	20.8	Face	1	1
2013-12-02	JN	IV_11758	31.5	97.6	7	21.8	Ear	1	1
2013-12-02	JN	IV_11759	30.2	97.6	7	21.8	Hand	1	1
2013-12-02	JN	IV_11762	32.8	75	6	28	Eye	1	1
2013-12-02	JN	IV_11764	30.1	75	7	27	Swelling	1	1
2013-12-02	JN	IV_11766	34.2	76	5	25.4	Ear	1	1
2013-12-02	JN	IV_11767	34.4	76	5	25.4	Ear	1	1
2013-12-03	JN	IV_11768	28.6	93	7	19	Swelling	1	1
2013-12-03	JN	IV_11769	31	93	7	19	Face	1	1
2013-12-03	JN	IV_11770	30.7	93	7	19	Ear	1	1
2013-12-03	JN	IV_11774	31.2	92.4	5	19.6	Ear	1	1
2013-12-03	JN	IV_11781	28.5	92.4	5	19.6	Hand	1	1
2013-12-03	JN	IV_11798	32	85	7	21.3	Ear	1	1
2013-12-03	JN	IV_11806	26.9	83.5	8	21.6	Swelling	1	1
2013-12-03	JN	IV_11809	31.6	83.5	5	21.6	Ear	1	1
2013-12-03	JN	IV_11811	32.5	83.5	5	21.6	Face	1	1
2013-12-03	JN	IV_11813	32.3	83.5	5	21.6	Mouth	1	1
2013-12-03	JN	IV_11814	30.9	83.5	5	21.6	Ear	1	1
2013-12-03	JN	IV_11820	30.9	83.4	4	22.7	Ear	1	1
2013-12-03	JN	IV_11822	32.5	82	4	22.5	Mouth	1	1
2013-12-03	JN	IV_11823	32.6	82	4	22.5	Eye	1	1
2013-12-03	OK	IV_11771	31.3	93	2	19	Swelling	0	4
2013-12-03	OK	IV_11772	30.5	93	2	19	Ear	0	4
2013-12-03	OK	IV_11795	32.5	91.1	6	20.6	Face	0	4
2013-12-03	OK	IV_11796	29.3	91.1	6	20.6	Swelling	0	4
2013-12-04	OK	IV_11824	28.4	94	6	22.7	Hand	0	4
2013-12-04	OK	IV_11825	32.6	94	6	22.7	Ear	0	4
2013-12-04	RH	IV_11826	31.1	94	8	22.7	Ear	0	4
2013-12-15	JN	IV_11827	29.6	74.4	5	18.2	Nose	1	0
2013-12-15	JN	IV_11829	27.7	74.4	5	18.2	Ear	1	0
2013-12-15	JN	IV_11830	31.5	74.4	5	18.2	Eye	1	0
2013-12-15	JN	IV_11831	22.4	74.4	5	18.2	Hand	1	0
2013-12-15	JN	IV_11834	29.8	74.4	5	18.5	Face	1	0
2013-12-19	KU	IV_11837	31.6	81.2	7	21	Ear	1	1
2013-12-19	KU	IV_11838	30.1	81.2	7	21	Swelling	1	1
2013-12-19	KU	IV_11839	33	81.1	6	21.2	Eye	1	1
2013-12-19	KU	IV_11840	31.2	81.1	6	21.2	Ear	1	1
2013-12-19	KU	IV_11842	27.1	81.1	6	21.2	Hand	1	1
2013-12-19	KU	IV_11845	32	81.1	6	21.2	Face	1	1
2013-12-19	KU	IV_11846	30.6	75	7	21.7	Foot	1	1
2013-12-19	KU	IV_11848	32.2	75	5	21.7	Ear	1	1
2013-12-19	KU	IV_11851	31.9	75	5	21.7	Mouth	1	1
2013-12-21	KU	IV_11858	31.1	95.5	8	20	Ear	1	3
2013-12-21	KU	IV_11859	32.3	95.5	8	20	Face	1	3
2013-12-21	ML	IV_11856	31.9	95.5	8	20	Face	0	0
2013-12-21	ML	IV_11857	30	95.5	8	20	Ear	0	0
2013-12-21	ML	IV_11866	33.4	89.3	6	21.3	Face	0	0
2013-12-21	RH	IV_11863	33.8	94	8	21.5	Nose	0	4
2013-12-21	RH	IV_11871	32	88.5	8	22.1	Ear	0	4
2013-12-21	RH	IV_11872	32.8	88.5	8	22.1	Face	0	4
2013-12-30	KU	IV_11899	32.9	89.3	4	23.8	Face	1	1
2013-12-30	KU	IV_11900	32	89.3	4	23.8	Ear	1	1
2013-12-30	KY	IV_11904	29	82	3	24.7	Swelling	0	4
2013-12-30	KY	IV_11905	34.6	82	3	24.7	Ear	0	4
2013-12-30	KY	IV_11906	35.5	82	3	24.7	Nose	0	4
2013-12-30	KY	IV_11908	34.4	82	3	24.7	Face	0	4
2013-12-30	ML	IV_11878	29.6	95.5	3	21	Ear	0	0
2013-12-30	ML	IV_11879	31.9	95.5	3	21	Face	0	0
2013-12-30	ML	IV_11880	29.7	95.5	3	21	Swelling	0	0
2013-12-30	ML	IV_11884	28	95.6	5	21.2	Hand	0	0
2013-12-30	ML	IV_11889	31.1	97.7	6	21.2	Swelling	0	0
2013-12-30	RH	IV_11873	30.1	92.7	9	20.6	Ear	0	4
2013-12-30	RH	IV_11874	31.9	92.7	9	20.6	Face	0	4
2013-12-31	KU	IV_11915	30.3	96.6	10	21.1	Face	1	2
2013-12-31	KU	IV_11916	30	96.6	8	21.1	Ear	1	2
2013-12-31	KU	IV_11917	28.1	96.6	10	21.1	Swelling	1	2
2013-12-31	KU	IV_11919	31.2	96.6	6	21.1	Ear	1	2
2013-12-31	KU	IV_11920	32.2	96.6	5	21.1	Eye	1	2
2013-12-31	KY	IV_11921	29.6	96.3	6	22.2	Swelling	0	4
2013-12-31	NB	IV_11909	28.2	97	3	20.5	Swelling	0	4
2013-12-31	NB	IV_11910	26.1	97	3	20.5	Hand	0	4
2013-12-31	NB	IV_11911	29.4	97	3	20.5	Ear	0	4
2013-12-31	NB	IV_11912	30.5	97	3	20.5	Face	0	4
2013-12-31	NB	IV_11914	25.5	97	3	20.5	Foot	0	4
2013-12-31	NB	IV_11923	32.2	96.3	8	22.2	Ear	0	4
2013-12-31	NB	IV_11924	32.2	92	6	22.8	Face	0	4
2013-12-31	NB	IV_11925	31.2	92	6	22.8	Swelling	0	4
2013-12-31	NB	IV_11927	26.2	65.3	8	23	Foot	0	4
2014-01-02	KU	IV_11929	31.5	78	8	22.8	Ear	1	2
2014-01-02	KU	IV_11930	29.9	78	8	22.8	Swelling	1	2
2014-01-02	KU	IV_11933	32.5	84	8	23.5	Face	1	2
2014-01-02	NB	IV_11934	33	84	8	23.5	Foot	0	4
2014-01-02	OK	IV_11938	33.3	84	6	23.5	Ear	0	2
2014-01-02	OK	IV_11958	32.8	63.5	2	26	Ear	0	2
2014-01-02	OK	IV_11959	33.3	63.5	2	26	Face	0	2
2014-01-02	RH	IV_11936	33.2	84	8	23.5	Face	0	2
2014-01-02	RH	IV_11937	31.6	84	8	23.5	Hand	0	2
2014-01-11	KU	IV_11979	25	90	5	17.5	Nose	1	1
2014-01-11	KU	IV_11980	28.6	90	5	17.5	Ear	1	1
2014-01-11	KU	IV_11981	29.9	90	5	17.5	Face	1	1
2014-01-11	KU	IV_11982	21.8	90	5	17.5	Hand	1	1
2014-01-11	KU	IV_11983	28.1	90	5	17.5	Ear	1	1
2014-01-11	KU	IV_11987	30.3	92.1	6	18.5	Face	1	1
2014-01-11	KU	IV_11988	29.7	92.1	6	18.5	Ear	1	1
2014-01-11	KU	IV_11996	29.7	92.5	4	18.8	Foot	1	1
2014-01-11	KU	IV_12002	33.2	92	4	18.9	Mouth	1	1
2014-01-11	KU	IV_12009	28.3	91	4	19	Hand	1	1
2014-01-11	KU	IV_12012	28.9	89	8	19.5	Swelling	1	1
2014-01-11	KU	IV_12015	30.9	76	6	23	Swelling	1	1
2014-01-11	KU	IV_12016	32.7	75.5	8	23.2	Face	1	1
2014-01-11	KU	IV_12019	32.5	75.5	8	23.2	Ear	1	1
2014-01-11	KU	IV_12020	28.2	75.5	8	23.2	Hand	1	1
2014-01-11	KU	IV_12021	28.9	75.5	8	23.2	Foot	1	1
2014-01-11	KU	IV_12025	29.6	75.4	8	23.5	Hand	1	1
2014-01-11	KU	IV_12026	30.3	75.4	8	23.5	Ear	1	1
2014-01-11	RH	IV_12029	30.4	75.3	4	23.7	Swelling	0	4
2014-01-14	KY	IV_12033	31.2	93.1	6	16.6	Face	0	2
2014-01-14	KY	IV_12036	28	97	4	19.2	Swelling	0	2
2014-01-14	KY	IV_12037	29.6	97	4	19.2	Face	0	2
2014-01-14	KY	IV_12038	24.3	97	4	19.2	Foot	0	2
2014-01-14	KY	IV_12040	29.9	99	6	21	Ear	0	2
2014-01-14	KY	IV_12044	26.9	98.2	7	21.3	Foot	0	2
2014-01-14	KY	IV_12045	32.1	85	7	21.9	Ear	0	2
2014-01-14	KY	IV_12046	31.7	85	7	21.9	Face	0	2
2014-01-14	KY	IV_12050	27.4	84	3	22.2	Hand	0	2
2014-01-14	KY	IV_12051	31.2	58.5	3	25.5	Swelling	0	2
2014-01-14	KY	IV_12053	33	58.5	3	25.5	Face	0	2
2014-01-14	KY	IV_12054	33.8	58.5	3	25.5	Ear	0	2
2014-01-14	ML	IV_12040	29.4	99	7	21	Swelling	0	0
2014-01-15	KU	IV_12061	33.1	90	5	23	Mouth	1	0
2014-01-15	KU	IV_12063	29.4	90	5	23	Swelling	1	0
2014-01-15	KU	IV_12064	31.9	90	5	23	Ear	1	0
2014-01-15	KY	IV_12065	30.6	89	3	23.5	Swelling	0	3
2014-01-15	KY	IV_12066	32.3	89	4	23.5	Ear	0	3
2014-01-15	KY	IV_12066	32.4	89	4	23.5	Face	0	3
2014-01-15	KY	IV_12067	29.4	89	4	23.5	Hand	0	3
2014-01-15	OK	IV_12055	30.6	96	3	21.8	Ear	0	2
2014-01-15	OK	IV_12056	30	90.8	3	22.8	Swelling	0	2
2014-01-15	OK	IV_12057	31.9	90.8	3	22.8	Ear	0	2
2014-01-15	OK	IV_12060	33.5	90.8	2	22.8	Face	0	2
2014-01-15	OK	IV_12068	29.9	80	2	25	Swelling	0	2
2014-01-16	JN	IV_12073	31.1	94.5	6	17.5	Face	0	0
2014-01-16	JN	IV_12073	26.4	94.5	6	17.5	Ear	0	0
2014-01-16	KY	IV_12069	26.3	94.5	4	17.5	Ear	0	4
2014-01-16	KY	IV_12120	32.1	69	6	25	Swelling	0	4
2014-01-16	NB	IV_12093	32.4	97.2	1	21.8	Ear	0	1
2014-01-16	NB	IV_12095	32.9	97.2	1	21.8	Face	0	1
2014-01-16	NB	IV_12096	30.2	97.2	1	21.8	Hand	0	1
2014-01-16	NB	IV_12121	34.1	69	2	26.3	Ear	0	1
2014-01-16	NB	IV_12122	33.1	69	5	26.3	Ear	0	1
2014-01-16	OK	IV_12078	27	94.5	6	17.5	Ear	0	3
2014-01-16	OK	IV_12079	31.4	94.5	6	17.5	Face	0	3
2014-01-16	OK	IV_12080	27.7	94.5	6	17.5	Hand	0	3
2014-01-16	OK	IV_12083	28.4	94.5	5	17.5	Swelling	0	3
2014-01-16	OK	IV_12090	27.3	92.1	2	17.1	Ear	0	3
2014-01-16	OK	IV_12098	31.7	97.2	7	21.8	Ear	0	3
2014-01-16	OK	IV_12099	32.5	97.2	7	21.8	Ear	0	3
2014-01-16	OK	IV_12101	32.9	97.2	7	21.8	Face	0	3
2014-01-16	OK	IV_12102	30.2	97.2	7	21.8	Hand	0	3
2014-01-16	OK	IV_12103	29.3	97.2	6	21.8	Swelling	0	3
2014-01-16	OK	IV_12106	34	85.4	3	24.3	Eye	0	3
2014-01-16	OK	IV_12107	33.4	85.4	3	24.3	Ear	0	3
2014-01-16	OK	IV_12108	31	85.4	3	24.3	Hand	0	3
2014-01-16	OK	IV_12109	31.3	85.4	3	24.3	Hand	0	3
2014-01-16	OK	IV_12112	33.8	85.4	2	24.3	Face	0	3
2014-01-16	OK	IV_12113	34.5	85.4	4	24.3	Eye	0	3
2014-01-16	OK	IV_12115	31.8	85.4	3	24.3	Swelling	0	3
2014-01-16	OK	IV_12118	31.4	69	2	25	Hand	0	3
2014-01-16	OK	IV_12119	33.6	69	2	25	Ear	0	3
2014-01-16	OK	IV_12123	31.8	69	4	26.3	Swelling	0	3
2014-01-16	OK	IV_12126	34.2	69	6	26.3	Face	0	3
2014-01-16	OK	IV_12129	34.8	69	6	26.3	Ear	0	3
2014-01-18	KU	IV_12170	33.5	61	5	25.3	Face	1	0
2014-01-18	KY	IV_12150	33.2	90	5	23	Ear	0	1
2014-01-18	KY	IV_12152	34.2	90	5	23	Face	0	1
2014-01-18	KY	IV_12153	31.3	90	5	23	Swelling	0	1
2014-01-18	KY	IV_12156	32	90	5	23	Hand	0	1
2014-01-18	KY	IV_12163	32.2	70	5	24.5	Ear	0	1
2014-01-18	KY	IV_12164	33.9	70	5	24.5	Ear	0	1
2014-01-18	KY	IV_12166	35	65	5	24.8	Eye	0	1
2014-01-18	KY	IV_12167	34.8	65	4	24.8	Mouth	0	1
2014-01-18	KY	IV_12168	33.2	65	4	24.8	Hand	0	1
2014-01-18	NB	IV_12145	28.5	93.7	6	19.7	Swelling	0	0
2014-01-18	NB	IV_12147	31.5	93.7	6	19.7	Face	0	0
2014-01-18	NB	IV_12148	25	93.7	6	19.7	Hand	0	0
2014-01-18	OK	IV_12141	28.8	93.7	4	19.7	Swelling	0	4
2014-01-18	OK	IV_12144	30.6	93.7	5	19.7	Face	0	4
2014-01-25	JN	IV_12176	33.9	80	7	24	Ear	0	0
2014-01-25	JN	IV_12178	31.5	80	7	23	Hand	0	0
2014-01-25	JN	IV_12181	34.1	79	7	23.5	Ear	0	0
2014-01-25	JN	IV_12182	34.1	78.6	7	24	Face	0	0
2014-01-25	KY	IV_12173	28.7	93	8	30	Swelling	0	3
2014-01-25	KY	IV_12175	32.8	80	7	24	Face	0	3
2014-01-25	KY	IV_12177	31.3	80	7	24	Hand	0	3
2014-01-28	JN	IV_12223	33	97.8	5	23.2	Ear	0	0
2014-01-28	JN	IV_12225	34.4	97.8	5	23.2	Ear	0	0
2014-01-28	JN	IV_12226	33.6	97.8	5	23.2	Face	0	0
2014-01-28	KU	IV_12199	29.1	94.8	6	17.3	Mouth	1	0
2014-01-28	KU	IV_12200	30.6	94.8	6	17.3	Face	1	0
2014-01-28	KU	IV_12202	29.2	94.8	6	17.3	Ear	1	0
2014-01-28	KU	IV_12205	28.4	94.7	5	17.5	Hand	1	0
2014-01-28	KU	IV_12217	31.2	97	7	19	Face	1	0
2014-01-28	KU	IV_12220	30.7	98.5	7	19.4	Ear	1	0
2014-01-28	KU	IV_12230	30.9	59.9	7	28.8	Swelling	1	0
2014-01-28	KU	IV_12232	33.3	59.9	5	28.8	Face	1	0
2014-01-28	KU	IV_12233	31.7	59.9	5	28.8	Hand	1	0
2014-01-28	KU	IV_12234	34.4	59.9	5	28.8	Ear	1	0
2014-01-28	KU	IV_12238	34.7	70	4	26.9	Ear	1	0
2014-01-28	KU	IV_12240	33.6	70	4	26.9	Face	1	0
2014-01-28	KU	IV_12247	31.2	79	5	27.2	Swelling	1	0
2014-01-28	KU	IV_12250	35	79	5	27.2	Nose	1	0
2014-01-28	KU	IV_12251	32.3	79	5	27.2	Foot	1	0
2014-01-28	KU	IV_12257	33.4	79	5	27.1	Hand	1	0
2014-01-28	KY	IV_12228	32.1	87	4	24.2	Swelling	0	4
2014-01-28	NB	IV_12248	30.7	79	4	27.2	Hand	0	0
2014-01-28	NB	IV_12249	32.1	79	4	27.2	Foot	0	0
2014-01-28	NB	IV_12252	34.7	79	5	27.2	Face	0	0
2014-01-28	NB	IV_12253	35	79	5	27.2	Ear	0	0
2014-01-28	NB	IV_12256	35.5	79	5	27.1	Ear	0	0
2014-01-29	KU	IV_12269	23.8	88.7	4	17.7	Foot	1	0
2014-01-29	KU	IV_12270	29.3	95.8	12	19	Face	1	0
2014-01-29	KU	IV_12271	28.1	95.8	12	19	Swelling	1	0
2014-01-29	KU	IV_12273	28.4	96.5	10	20	Swelling	1	0
2014-01-29	KU	IV_12275	32.5	71.3	6	24.8	Ear	1	0
2014-01-29	KU	IV_12277	31.5	71.3	5	24.8	Ear	1	0
2014-01-29	KU	IV_12280	33.1	71.3	5	24.8	Face	1	0
2014-01-29	KU	IV_12282	30.2	71.3	7	24.8	Swelling	1	0
2014-01-29	KU	IV_12283	29.2	71.3	5	24.8	Hand	1	0
2014-01-29	KY	IV_12285	33.9	72.4	6	27.3	Ear	0	4
2014-01-29	KY	IV_12287	33.8	72.4	6	27.3	Face	0	4
2014-01-29	ML	IV_12291	34.2	72.4	4	27.3	Face	0	0
2014-01-29	ML	IV_12292	34.2	72.4	4	27.3	Ear	0	0
2014-01-29	ML	IV_12293	31.2	72.4	4	27.3	Foot	0	0
2014-01-29	OK	IV_12295	30.5	72.4	4	27.3	Hand	1	4
2014-01-29	OK	IV_12296	34.6	72.4	4	27.3	Ear	1	4
2014-01-29	OK	IV_12297	34.7	72.4	4	27.3	Face	1	4
2014-01-30	ML	IV_12298	32.5	94.4	8	19.1	Face	0	0
2014-01-30	ML	IV_12303	29.4	95	6	20	Ear	0	0
2014-01-30	ML	IV_12308	32.2	98	7	21.7	Face	0	0
2014-01-30	ML	IV_12310	31	98	7	21.7	Ear	0	0
2014-01-30	ML	IV_12312	29.1	98	7	21.7	Swelling	0	0
2014-01-30	ML	IV_12324	32	97	5	24	Hand	0	0
2014-01-30	ML	IV_12326	34.4	97	5	24	Face	0	0
2014-01-30	ML	IV_12328	34.1	96	5	24.5	Ear	0	0
2014-01-30	ML	IV_12331	33	95.1	5	24.7	Ear	0	0
2014-01-30	ML	IV_12338	31.9	73.8	10	27.4	Swelling	0	0
2014-01-30	MN	IV_12313	33.4	98	7	22.5	Ear	0	0
2014-01-30	MN	IV_12314	31.4	98	8	22.5	Hand	0	0
2014-01-30	MN	IV_12322	34.3	97	5	24	Face	0	0
2014-01-30	MN	IV_12332	35.1	95.1	5	24.7	Ear	0	0
2014-02-01	ML	IV_12339	28.7	90	7	19.4	Ear	0	0
2014-02-01	ML	IV_12340	27.2	90	7	19.4	Swelling	0	0
2014-02-01	ML	IV_12342	31.4	90	7	19.4	Face	0	0
2014-02-01	ML	IV_12348	28.6	95.5	6	21.8	Ear	0	0
2014-02-01	ML	IV_12353	30.5	95.5	6	21.8	Ear	0	0
2014-02-01	ML	IV_12354	32.3	95.5	6	21.8	Face	0	0
2014-02-01	ML	IV_12357	30.5	94	10	23	Swelling	0	0
2014-02-01	ML	IV_12364	32.8	81.2	8	26	Ear	0	0
2014-02-01	ML	IV_12366	32.3	81.2	10	26	Ear	0	0
2014-02-01	ML	IV_12367	33.9	81.2	10	26	Face	0	0
2014-02-01	ML	IV_12368	30.7	81.2	10	26	Hand	0	0
2014-02-01	ML	IV_12377	31.6	85	5	25.5	Hand	0	0
2014-02-01	ML	IV_12378	31.3	85	5	25.5	Swelling	0	0
2014-02-01	MN	IV_12372	33.9	83	9	26	Face	0	0
2014-02-01	MN	IV_12375	32.3	84	9	26	Foot	0	0
2014-02-19	KL	IV_13689	33.4	30	6	28	Swelling	1	4
2014-02-19	KL	IV_13693	32.8	40	8	29.3	Swelling	1	4
2014-02-19	KL	IV_13694	33.3	40	8	29.3	Face	1	4
2014-02-19	KL	IV_13695	34	40	8	29.3	Ear	1	4
2014-02-19	OK	IV_13690	33.8	30	1	28	Ear	1	3
2014-02-19	OK	IV_13690	33.4	30	1	28	Face	1	3
2014-02-21	JN	IV_14016	33.6	93	5	23	Ear	0	4
2014-02-21	JN	IV_14017	30.4	93	5	23	Swelling	0	4
2014-02-21	KL	IV_14012	31.9	94	5	22.5	Ear	1	4
2014-02-21	KL	IV_14013	33.5	94	5	22.5	Face	1	4
2014-02-21	KL	IV_14023	33.8	85	6	24	Face	1	4
2014-02-21	KL	IV_14025	34.1	84	3	25	Ear	1	4
2014-02-21	KL	IV_14026	31.3	84	3	25	Swelling	1	4
2014-02-21	ML	IV_14002	29.8	95	4	22	Foot	0	0
2014-02-21	ML	IV_14003	33.8	95	4	22	Face	0	0
2014-02-21	ML	IV_14007	32.7	95	4	22	Ear	0	0
2014-02-25	JN	IV_14213	32.9	90.8	6	21.8	Face	0	4
2014-02-25	JN	IV_14221	30.1	92	6	22.5	Swelling	0	4
2014-02-25	KL	IV_14227	28.2	92.8	6	23.4	Swelling	1	3
2014-02-25	KL	IV_14228	32.7	92.8	6	23.4	Face	1	3
2014-02-25	KL	IV_14229	33.5	92.8	8	23.4	Ear	1	3
2014-02-25	KL	IV_14233	33.8	71	8	27	Ear	1	3
2014-02-25	KL	IV_14234	33.7	71	8	27	Face	1	3
2014-02-25	NB	IV_14214	28.7	91	5	22	Swelling	0	0
2014-02-25	NB	IV_14215	30.7	91	5	22	Foot	0	0
2014-02-25	NB	IV_14216	30.2	91	5	22	Hand	0	0
2014-02-25	NB	IV_14219	34.4	91	5	22	Ear	0	0
2014-06-02	JN	IV_14236	31.1	82.9	7	25.1	Swelling	0	0
2014-06-02	JN	IV_14240	33.2	88.6	5	24.2	Ear	0	0
2014-06-02	JN	IV_14244	33.8	87.9	5	24.7	Ear	0	0
2014-06-02	JN	IV_14246	33.1	86.7	6	24.6	Face	0	0
2014-06-02	JN	IV_14271	31.6	85.3	3	26.4	Face	0	0
2014-06-02	JN	IV_14272	31.5	85.3	3	26.4	Ear	0	0
2014-06-02	JN	IV_14273	29.8	85.3	3	26.4	Nose	0	0
2014-06-02	JN	IV_14274	30.6	87.2	5	23.5	Swelling	0	0
2014-06-02	JN	IV_14281	33.3	90.1	4	25.1	Eye	0	0
2014-06-04	OK	IV_14319	30.2	87.8	3	21.7	Nose	1	2
2014-06-04	OK	IV_14321	24.8	88.9	2	21.8	Ear	1	2
2014-06-04	OK	IV_14323	26.8	87.3	3	22.1	Swelling	1	2
2014-06-04	OK	IV_14529	28.5	83	5	25.4	Ear	1	2
2014-06-04	OK	IV_14533	33.7	82.8	4	24.6	Eye	1	2
2014-06-04	OK	IV_14535	26.8	86.5	5	24.3	Ear	1	2
2014-06-05	NB	IV_14536	29.2	74.8	7	28.9	Ear	0	0
2014-06-10	KR	IV_15179	32.1	82.2	5	28.5	Face	0	1
2014-06-10	KR	IV_15182	32.2	82.2	5	28.5	Swelling	0	1
2014-06-10	KR	IV_15185	29.3	82.2	5	28.5	Ear	0	1
2014-06-11	KR	IV_15195	27	79.4	5	24.8	Swelling	0	1
2014-06-11	KR	IV_15199	29.8	78	5	25.1	Ear	0	1
2014-06-11	NB	IV_15516	30.4	87.6	10	29.7	Ear	0	0
2014-06-11	NB	IV_15517	31.1	87.6	10	29.7	Face	0	0
2014-06-11	NB	IV_15518	29.3	93.6	10	29.4	Swelling	0	0
2014-06-14	OK	IV_16516	33.3	85.1	3	25.2	Ear	1	2
2014-06-14	OK	IV_16517	28.9	85.1	3	25.2	Swelling	1	2
2014-06-14	OK	IV_16518	33.3	85.1	3	25.2	Ear	1	2
2014-06-14	OK	IV_16520	32.5	85.1	3	25.2	Face	1	2
2014-06-14	OK	IV_16522	33.4	85.1	3	25.2	Eye	1	2
2014-06-14	NB	IV_16651	30.8	90.1	3	25.2	Swelling	0	0
2014-06-14	NB	IV_16652	32.3	90.1	3	25.2	Ear	0	0
2014-06-14	KR	IV_17053	31.8	88.1	9	25.5	Swelling	0	2
2014-06-14	KR	IV_17092	32.4	85.9	7	26.4	Ear	0	2
2014-06-14	KR	IV_17093	32.7	88.1	9	25.5	Face	0	2
2014-06-19	OK	IV_17634	30.1	83.1	3	27.1	Ear	1	2
2014-06-19	OK	IV_17639	28.5	80.9	3	27.1	Swelling	1	2
2014-06-19	NB	IV_17643	31.5	78	4	28.4	Nose	0	0
2014-06-19	NB	IV_17645	32.4	78	4	28.4	Ear	0	0
2014-06-19	NB	IV_17646	29.9	82	4	27.6	Swelling	0	0
2014-06-20	OK	IV_17868	27.9	85.7	4	23.4	Swelling	1	2
2014-06-20	OK	IV_17885	32.5	94.5	4	23	Face	1	2
2014-06-20	OK	IV_17886	30.8	94.5	4	23	Ear	1	2
2014-06-20	OK	IV_17889	28.1	94.5	4	23	Swelling	1	2
2014-06-24	OK	IV_17964	30.1	93.8	7	20.4	Swelling	1	1
2014-06-24	OK	IV_17966	29.3	93.5	5	21.3	Swelling	1	1
2014-06-24	OK	IV_17980	29.8	83.8	6	25.5	Swelling	1	1
2014-06-24	OK	IV_17981	32.2	89.8	4	25.3	Ear	1	1
2014-06-24	OK	IV_17982	32.8	89.8	4	25.3	Face	1	1
2014-06-24	OK	IV_17984	33.5	89.8	4	25.3	Eye	1	1
2014-06-24	OK	IV_17985	33.5	89.8	4	25.3	Nose	1	1
2014-06-24	NB	IV_17986	33.2	81.2	2	24.7	Ear	0	0
2014-06-24	NB	IV_17988	28.6	81.2	2	24.7	Hand	0	0
2014-06-25	KR	IV_18001	28.8	94.1	4	20.3	Ear	0	4
2014-06-25	KR	IV_18005	30.4	90.5	6	20.3	Swelling	0	4
2014-06-27	KR	IV_18129	30.6	97.4	5	22.3	Ear	0	3
2014-06-27	KR	IV_18131	32.2	96.5	6	22.9	Face	0	3
2014-06-27	KR	IV_18133	30.9	96.5	6	22.9	Nose	0	3
2014-06-27	KR	IV_18135	28.3	93.3	3	23.3	Swelling	0	3
2014-06-27	KR	IV_18137	27.4	93.7	5	23.7	Nose	0	3
2014-06-27	KR	IV_18141	30.9	93.5	3	23.8	Ear	0	3
2014-06-27	KR	IV_18142	31.6	93.5	3	23.8	Face	0	3
